# Supplementary material for: 2-Aminofluorene based triazole cocktailed with organosilane as UV-visible and fluorescence sensor for the highly selective detection of Fe(iii) ion and its anti-leishmanial activity
Source: Royal Society of Chemistry journal article supplement (doi:10.1039/d3nj00105a), 2023-01-01
Supplement: d3nj00105a1.pdf [file d3nj00105a1.pdf]

## **2-aminofluorene based triazole cocktailed with organosilane as UV-Visible and fluorescence sensor for highly selective detection of Fe(III) ion and its anti-leishmanial activity**

*Gurjaspreet Singh<sup>a\*</sup>, Sofia Gupta<sup>a\*</sup>, Pawan<sup>a</sup>, Mohit<sup>a</sup>, Diksha<sup>a</sup>, Isha Saini<sup>b</sup>, Vikas<sup>a</sup>, Brij Mohan<sup>c</sup>, Sanjeev Soni<sup>d</sup>*

*<sup>a</sup>Department of Chemistry, Panjab University, Chandigarh, 160014, India*

*<sup>b</sup>Department of Zoology, Panjab University, Chandigarh, 160014, India*

*<sup>c</sup>College of Ocean Food and Biological Engineering, Jimei University, 185 Yinjiang Road, Jimei District, Xiamen, 361021*

*<sup>d</sup>Department of Chemistry, GGSDS college Chandigarh, 160032 India*

\*Corresponding Authors

Prof. Gurjaspreet Singh

Department of Chemistry & Centre of Advanced Studies

Panjab University, Chandigarh, India

Email: [gjpsingh@pu.ac.in](mailto:gjpsingh@pu.ac.in)

Tel. No: 0172-2534428, 09814302099, 9317502099

Fax No: 0172-2545074

Miss Sofia Gupta

Research Scholar

Department of Chemistry & Centre of Advanced Studies

Panjab University, Chandigarh, India

Email: [sofiagupta02@gmail.com](mailto:sofiagupta02@gmail.com)

Tel. No: 9888120902

## Table of Contents :

| Entry                                                                                   | Page No. |
|-----------------------------------------------------------------------------------------|----------|
| <sup>1</sup> H NMR spectrum of compound 5a ( Fig.S1).....                               | 3        |
| <sup>1</sup> H NMR spectrum of compound 5b ( Fig.S2).....                               | 3        |
| <sup>1</sup> H NMR spectrum of compound 6a ( Fig.S3).....                               | 4        |
| <sup>1</sup> H NMR spectrum of compound 6b (Fig. S4).....                               | 4        |
| <sup>13</sup> C NMR spectrum of compound 5a (Fig. S5).....                              | 5        |
| <sup>13</sup> C NMR spectrum of compound 5b (Fig. S6).....                              | 5        |
| <sup>13</sup> C NMR spectrum of compound 6a (Fig. S7).....                              | 6        |
| <sup>13</sup> C NMR spectrum of compound 6b (Fig. S8).....                              | 6        |
| Mass spectrum of compound 5a (Fig. S9).....                                             | 7        |
| Mass spectrum of compound 5b (Fig. S10) .....                                           | 7        |
| Mass spectrum of compound 6a (Fig.S11).....                                             | 8        |
| Mass spectrum of compound 6b (Fig.S12).....                                             | 8        |
| pH effect of 6a and 6a+Fe <sup>3+</sup> complex (Fig.S13).....                          | 9        |
| Selectivity studies (Fig. S14).....                                                     | 9        |
| Response time studies (Fig. S15).....                                                   | 9        |
| <sup>1</sup> H NMR spectra of compound <b>6a</b> and 6a+Fe <sup>3+</sup> (Fig.S16)..... | 10       |
| XPS spectra of 6a and 6a+Fe <sup>3+</sup> of C 1s and Si 2p (Fig.S17).....              | 10       |



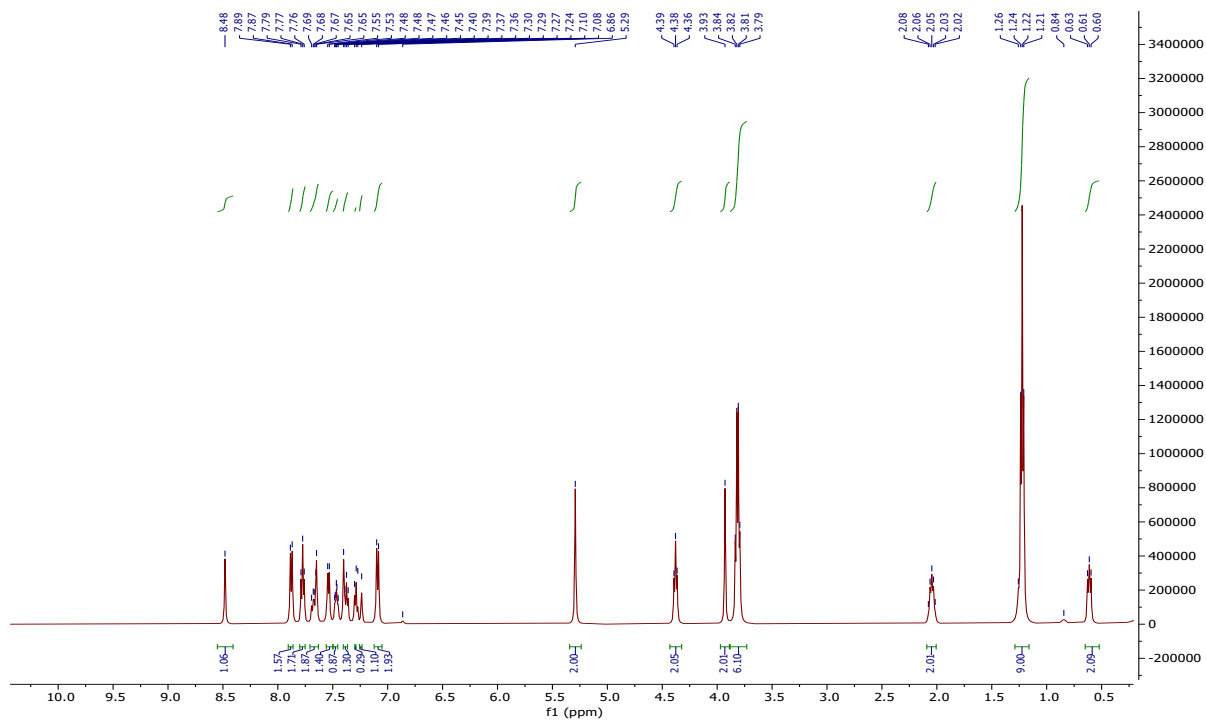

**Fig.S3:**  $^1\text{H}$  NMR spectrum of compound **6a**

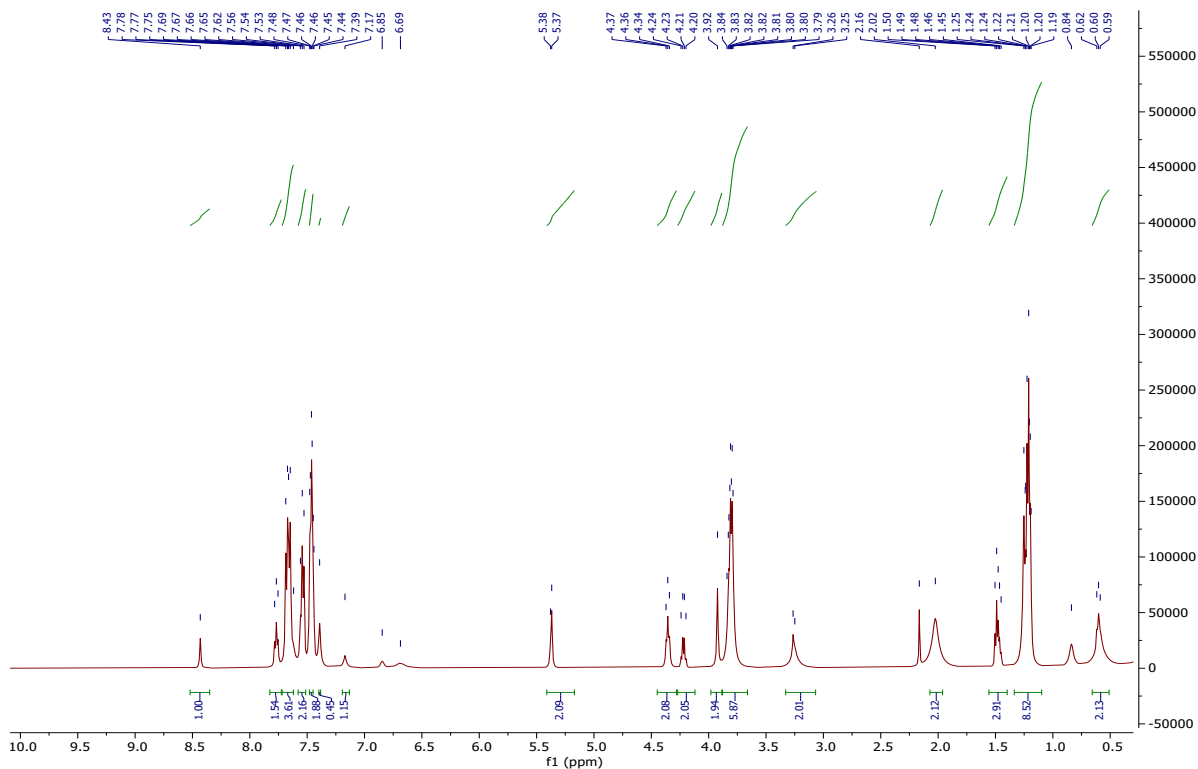

**Fig.S4:**  $^1\text{H}$  NMR spectrum of compound **6b**

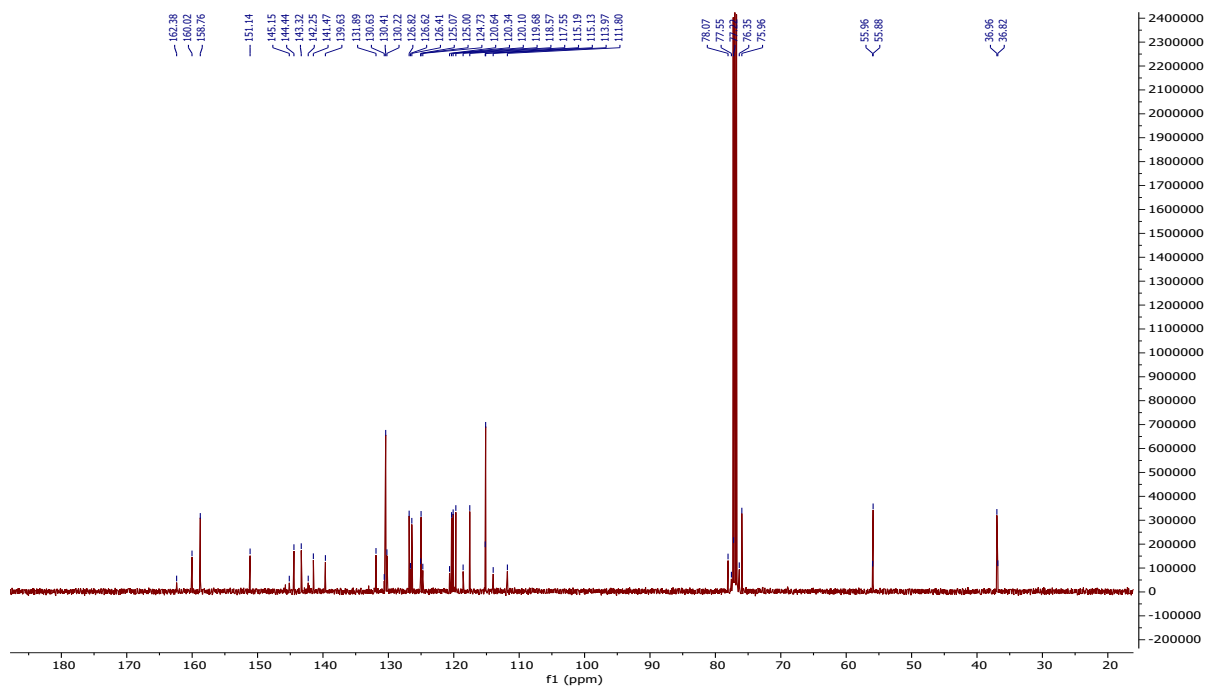

**Fig.S5:**  $^{13}\text{C}$  NMR spectrum of compound **5a**

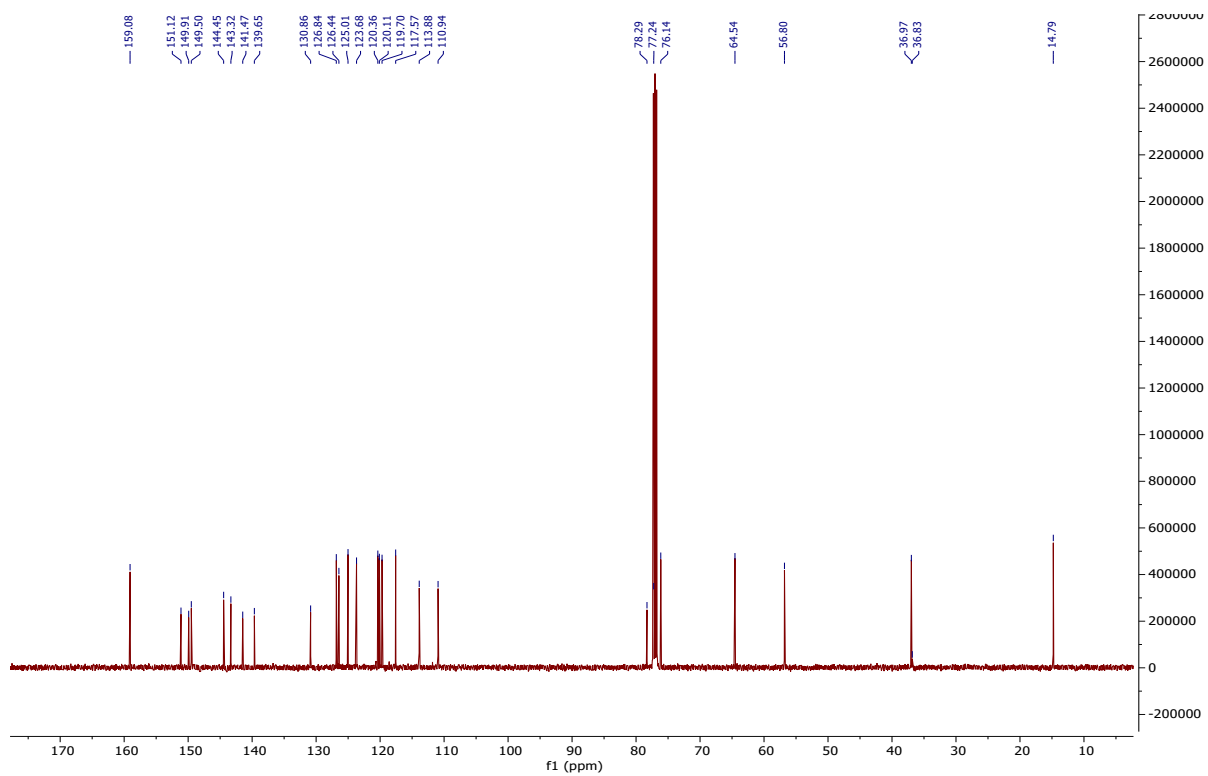

**Fig.S6:**  $^{13}\text{C}$  NMR spectrum of compound **5b**

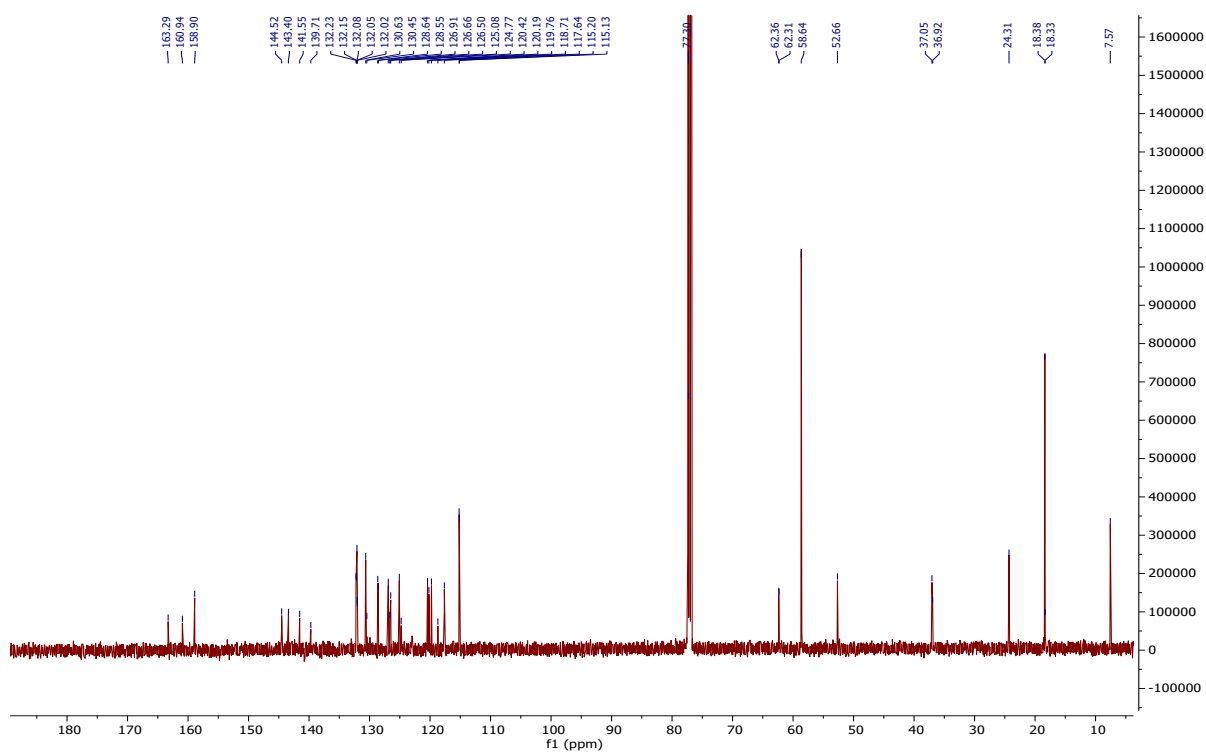

**Fig.S7:**  $^{13}\text{C}$  NMR spectrum of compound **6a**

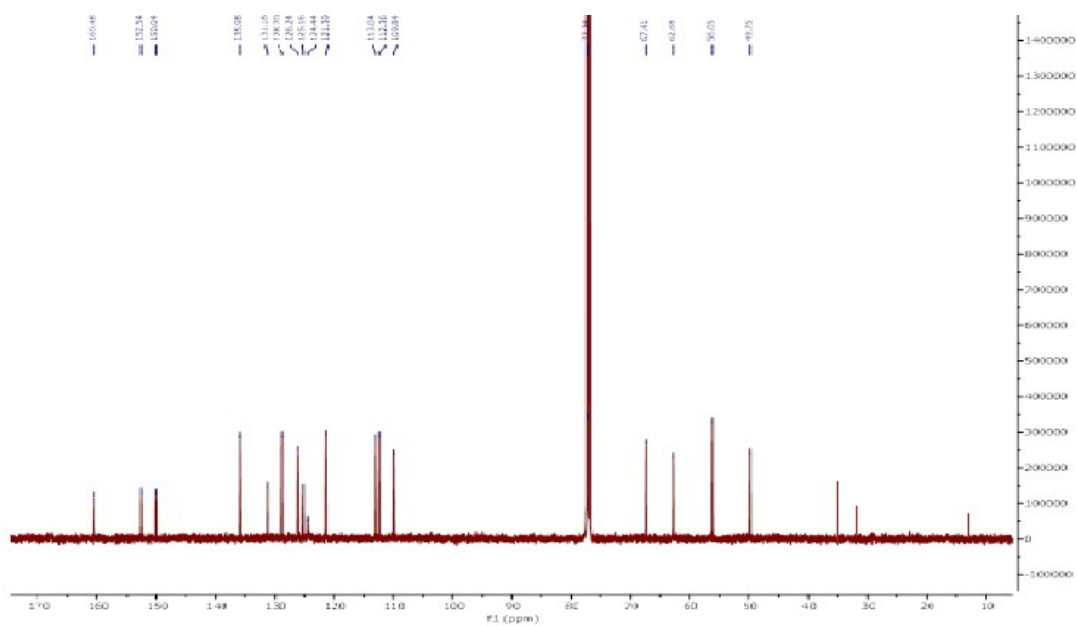

**Fig.S8:**  $^{13}\text{C}$  NMR spectrum of compound **6b**

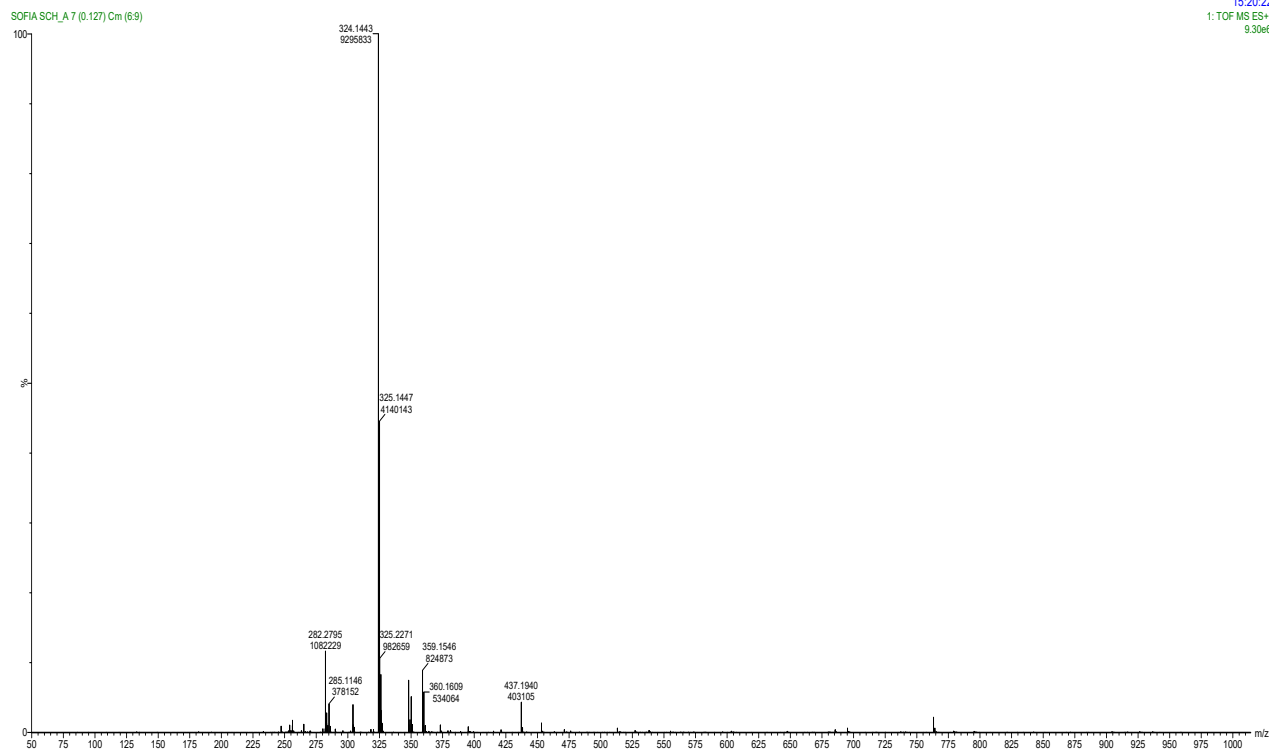**Fig.S9: Mass spectrum spectrum of compound 5a**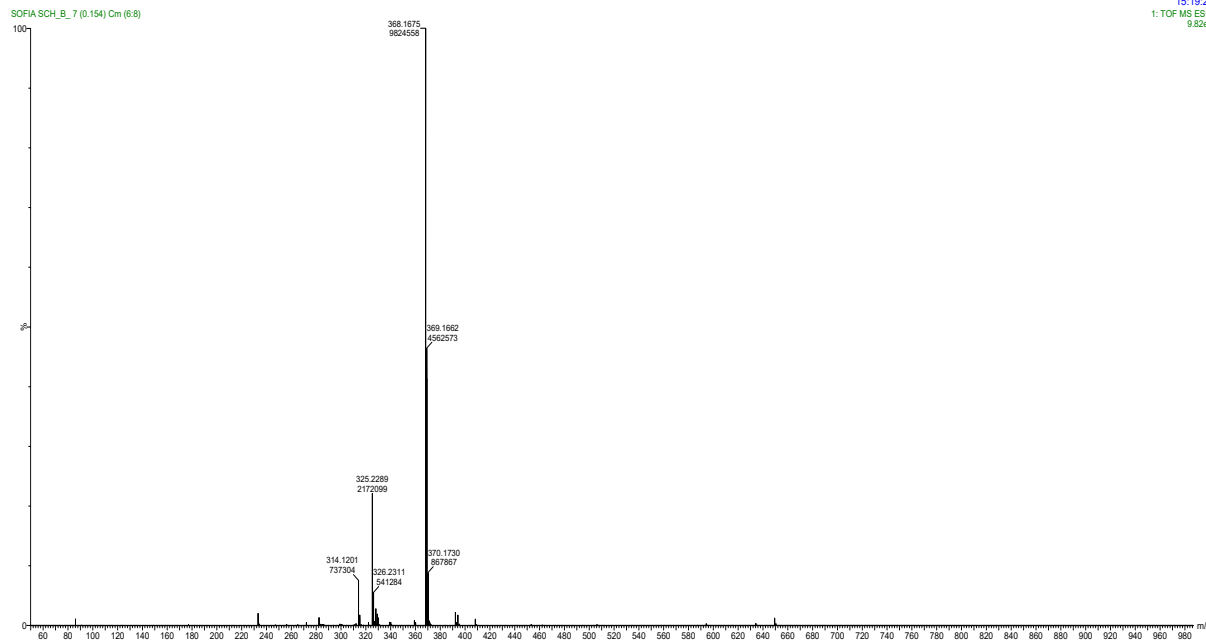**Fig.S10: Mass spectrum spectrum of compound 5b**

WATERS,Q-TOF MICROMASS (ESI-MS)  
SOFIA SIL\_S\_1 17 (0.232) Sm (SG, 2x3.00); Cm (2:28)

SAIF/CIL,PANJAB UNIVERSITY,CHANDIGARH

TOF MS ES+  
1.51e4

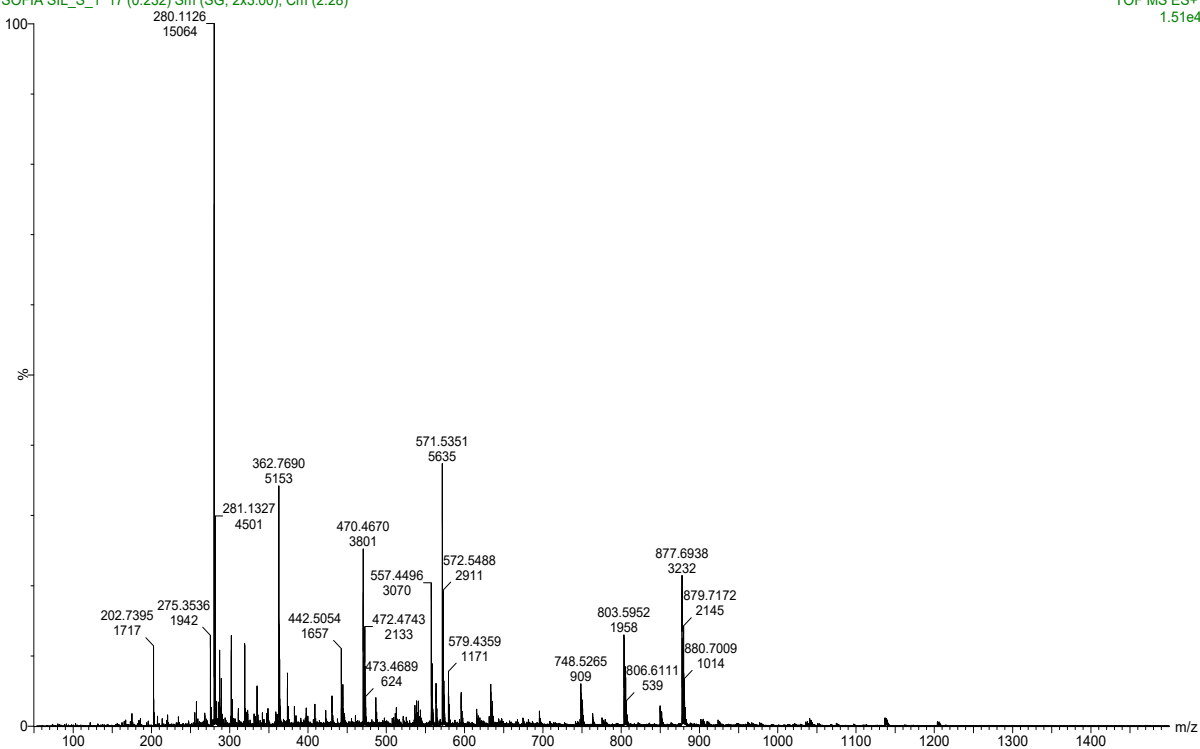

Fig.S11: Mass spectrum spectrum of compound 6a

SAIF,PANJAB UNIVERSITY CHANDIGARH

SYNAPT-XS#DBA064

20-Jun-2022  
15:20:09  
1: TOF MS ES+  
4.45e4

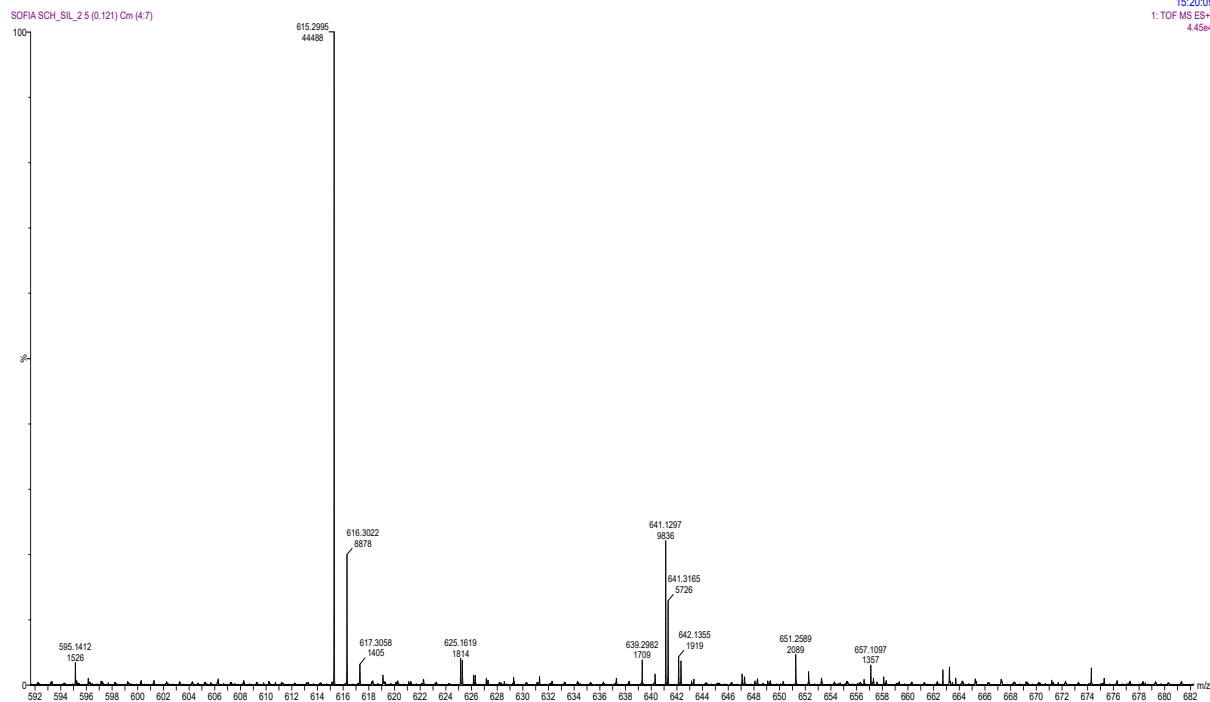



**Fig.S12:** Mass spectrum spectrum of compound **6b**

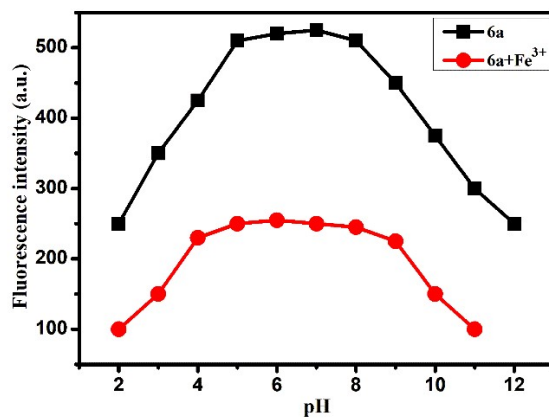

**Fig.S13:** pH effect

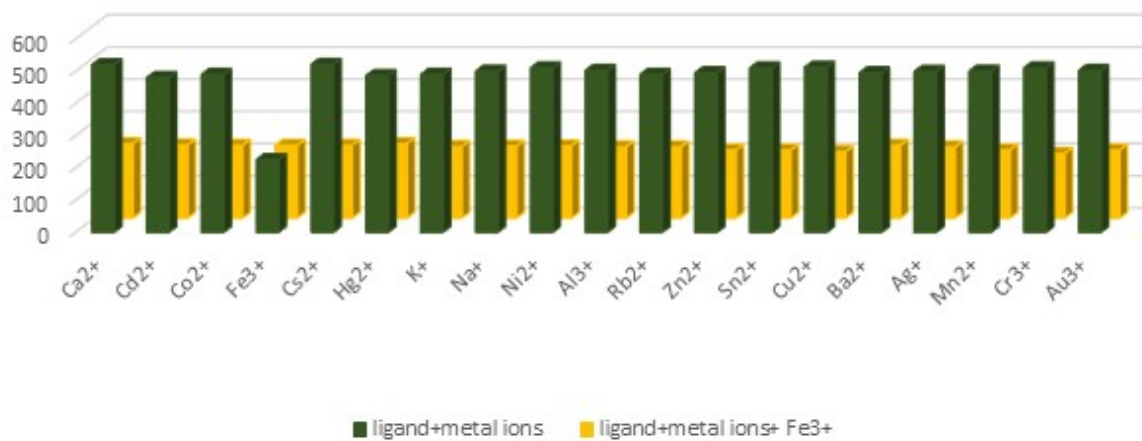

**Fig.S14:** Selectivity studies

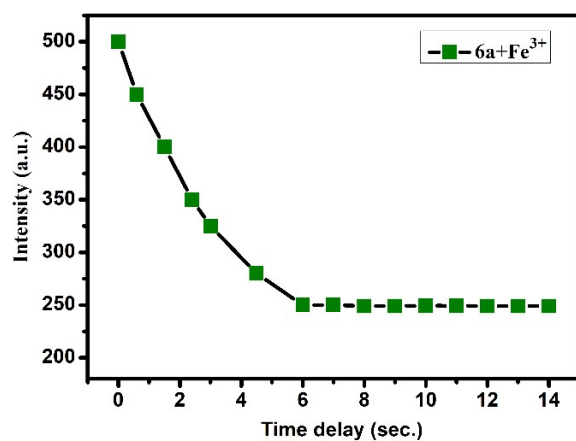

Fig.S15: Response time studies

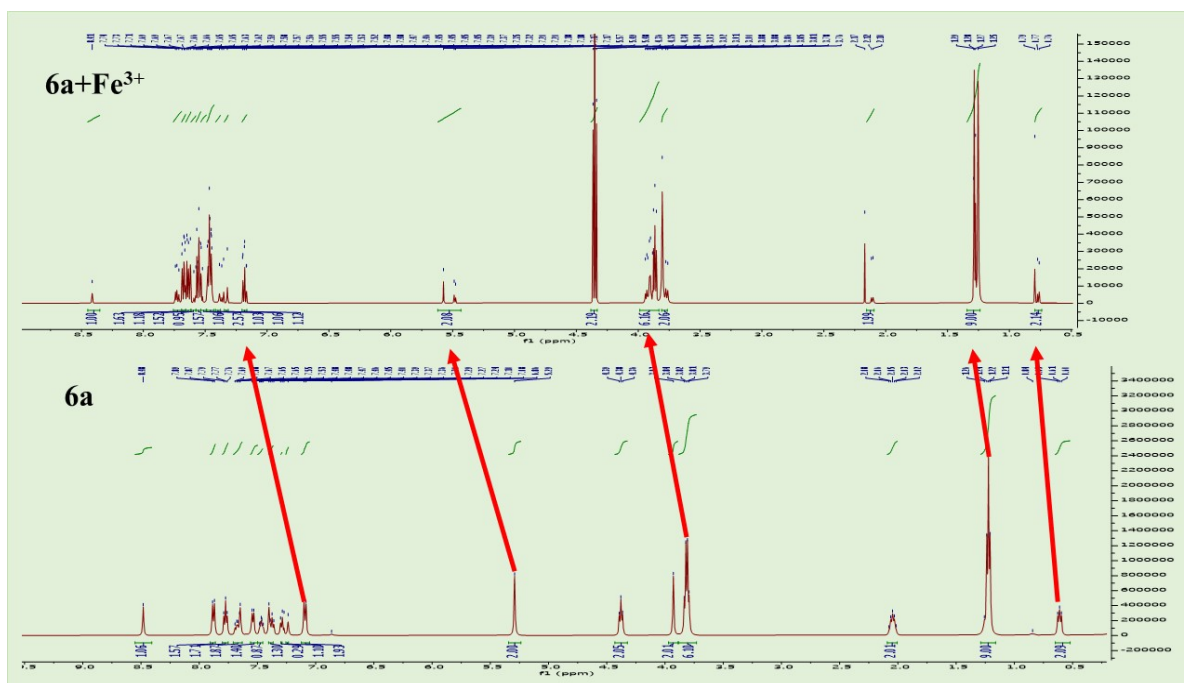

Fig.S16  $^1\text{H}$  NMR spectra of compound **6a** and its complex with  $\text{Fe}^{3+}$  ions.

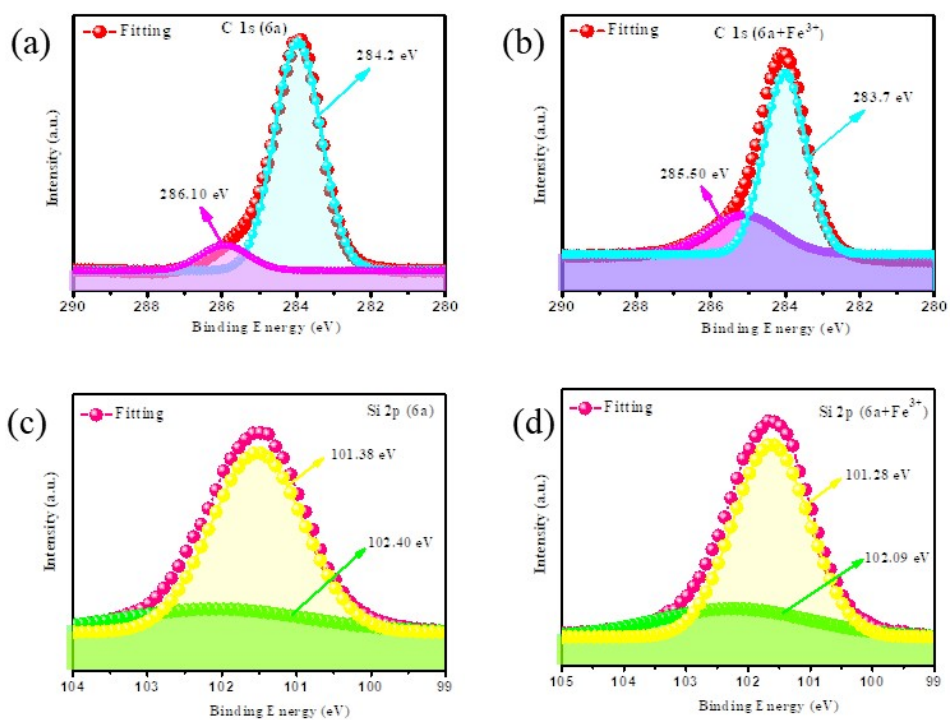

**Fig.S17** XPS spectra of **6a** and 6a+Fe<sup>3+</sup>. (a) C 1s spectra of **6a**, (b) C 1s spectra of 6a+Fe<sup>3+</sup>, (c) Si 2p spectra of **6a**, and (d) Si 2p spectra of 6a+Fe<sup>3+</sup>.
